# Supplementary material for: Mechanism of mitoribosomal small subunit biogenesis and preinitiation
Source: PubMed Central journal article supplement (PMC9200640; doi:10.1038/s41586-022-04795-x), 2022-06-08
Supplement: 41586_2022_4795_MOESM1_ESM.pdf [file 41586_2022_4795_MOESM1_ESM.pdf]

**Supplementary information**

---

**Mechanism of mitoribosomal small subunit biogenesis and preinitiation**

---

In the format provided by the authors and unedited

## **Mechanism of mitoribosomal small subunit biogenesis and preinitiation**

Yuzuru Itoh<sup>1,9</sup>, Anas Khawaja<sup>2,3,9</sup>, Ivan Laptev<sup>4,5,6</sup>, Miriam Cipullo<sup>2,3</sup>, Ilian Atanassov<sup>7</sup>, Petr Sergiev<sup>4,5,6,8</sup>, Joanna Rorbach<sup>2,3\*</sup>, Alexey Amunts<sup>1\*</sup>

<sup>1</sup> Science for Life Laboratory, Department of Biochemistry and Biophysics, Stockholm University, 17165 Solna, Sweden.

<sup>2</sup> Department of Medical Biochemistry and Biophysics, Karolinska Institute, 17177 Stockholm, Sweden.

<sup>3</sup> Max Planck Institute for Biology of Ageing-Karolinska Institutet Laboratory, Karolinska Institutet, Stockholm 17165, Sweden.

<sup>4</sup> Center of Life Sciences, Skolkovo Institute of Science and Technology, Skolkovo, Moscow 143028, Russia.

<sup>5</sup> Department of Chemistry, Lomonosov Moscow State University, Moscow 119992, Russia.

<sup>6</sup> Belozersky Institute of Physico-Chemical Biology, Lomonosov Moscow State University, Moscow 119992, Russia.

<sup>7</sup> Proteomics Core Facility, Max-Planck-Institute for Biology of Ageing, Joseph-Stelzmann-Str. 9b, 50931 Cologne, Germany

<sup>8</sup> Institute of Functional Genomics, Lomonosov Moscow State University, Moscow 119992, Russia.

<sup>9</sup> These authors contributed equally

### **SUPPLEMENTARY INFORMATION**

## **Table of content:**

**SI Figure 1. Cryo-EM processing overview for preSSU-1 and preSSU-2 states.**

**SI Figure 2. Cryo-EM processing overview for preSSU-3, preSSU-4, PIC-1, IC states.**

**SI Figure 3. Cryo-EM processing overview for preSSU-3, preSSU-4, PIC-1, IC and LSU states.**

**SI Figure 4. Full-length blots from figure 3d-e and extended data fig 11a.**

**SI Figure 5. Full-length sucrose gradient blots from figure 3e.**

**SI Figure 6. Full-length sucrose gradient blots from extended data fig 10b-c.**

**SI Figure 7. Western blot and sucrose gradient: HEK293T and mtIF3 KO.**

**SI Figure 8. Full-length blots from SI figure 7.**

**Supplementary Table 1. Cryo-EM statistics for preSSU-1 and preSSU-2.**

**Supplementary Table 2. Cryo-EM statistics for preSSU-3, preSSU-4, PIC-1, IC, LSU.**

**Supplementary Table 3. The positions/numbering of mouse 12S rRNA corresponding to that of human 12S rRNA.**

**Supplementary Table 4. List of guide RNAs and antibodies.**

**SI Video 1. Density maps and models of the SSU assembly states.** Overall refined maps, combined local-masked refined maps, and models are shown for each of the states.

**SI Video 2. States preSSU-1 to preSSU-3.** Transition from preSSU-1 through preSSU-2 to preSSU-3, and RBFA conformational change.

**SI Video 3. States preSSU-3a to preSSU-3c.** Transition from preSSU-3a through preSSU-3b to preSSU-3c, and rRNA modifications.

**SI Video 4. States preSSU-3 to PIC-1.** Transition from preSSU-3 through PIC-1 to initiation complex with mRNA, fMet-tRNA(Met) with f5C modification, and mtIF2.

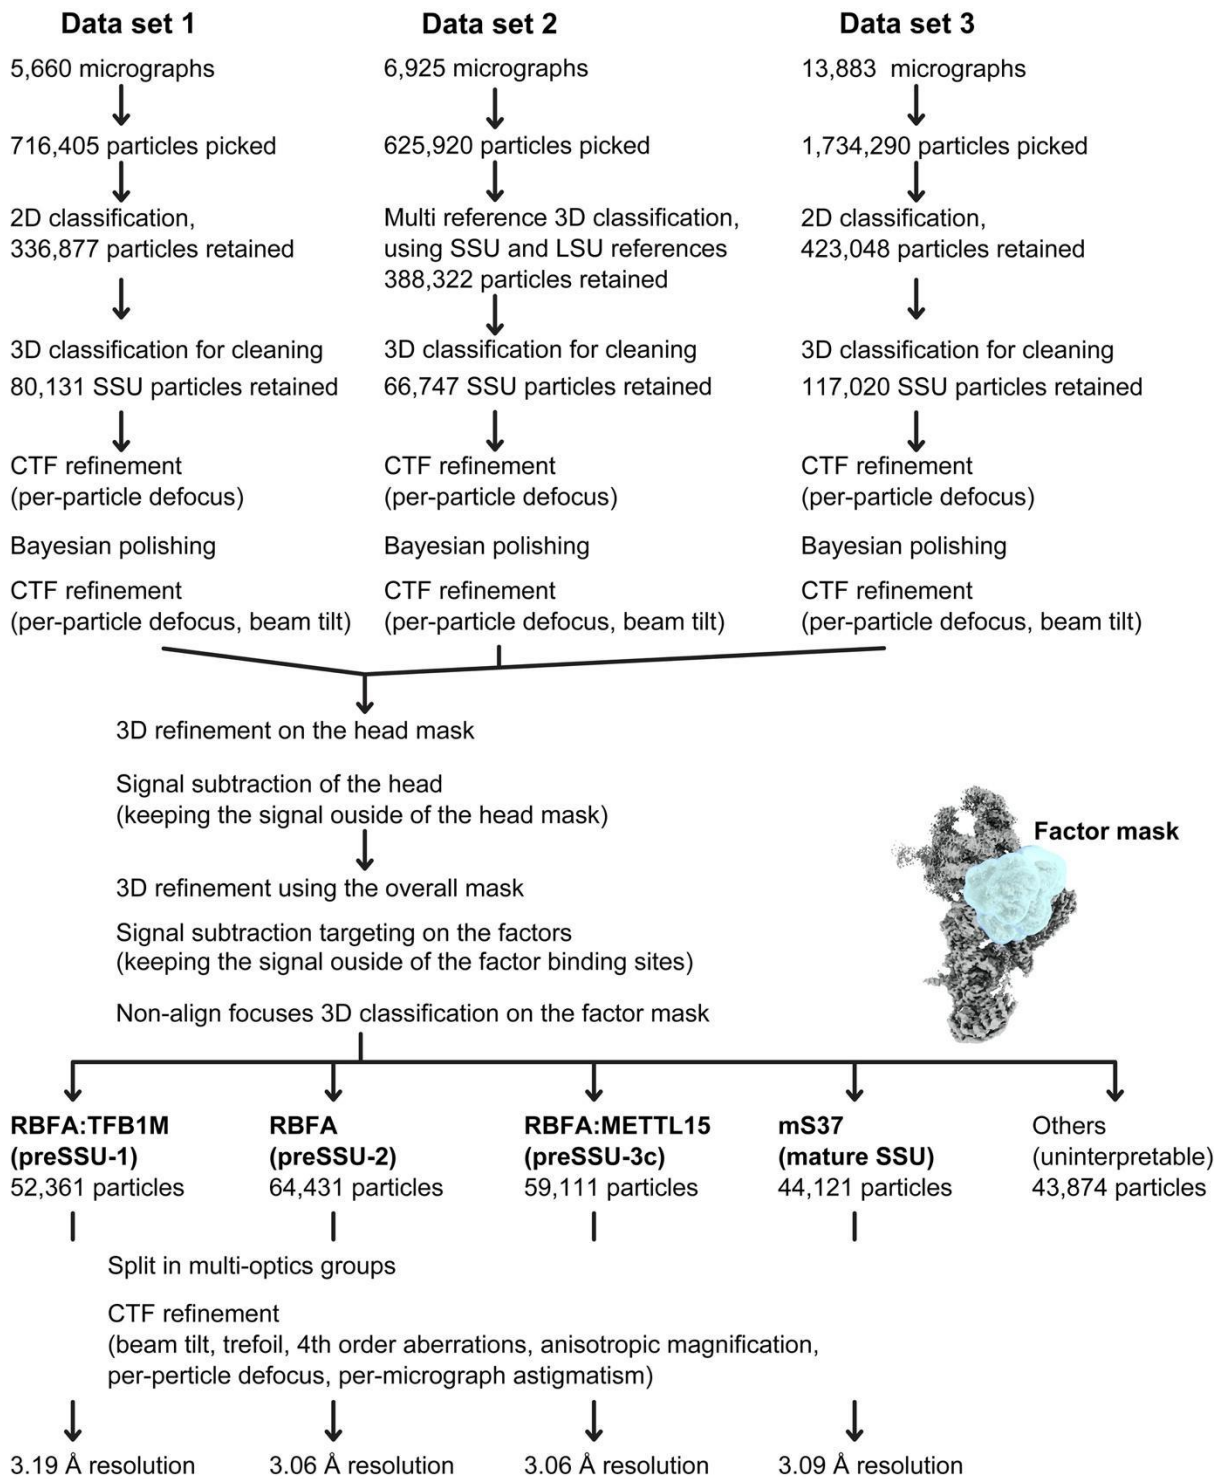

**SI Figure 1. Cryo-EM processing overview for preSSU-1 and preSSU-2 states.**

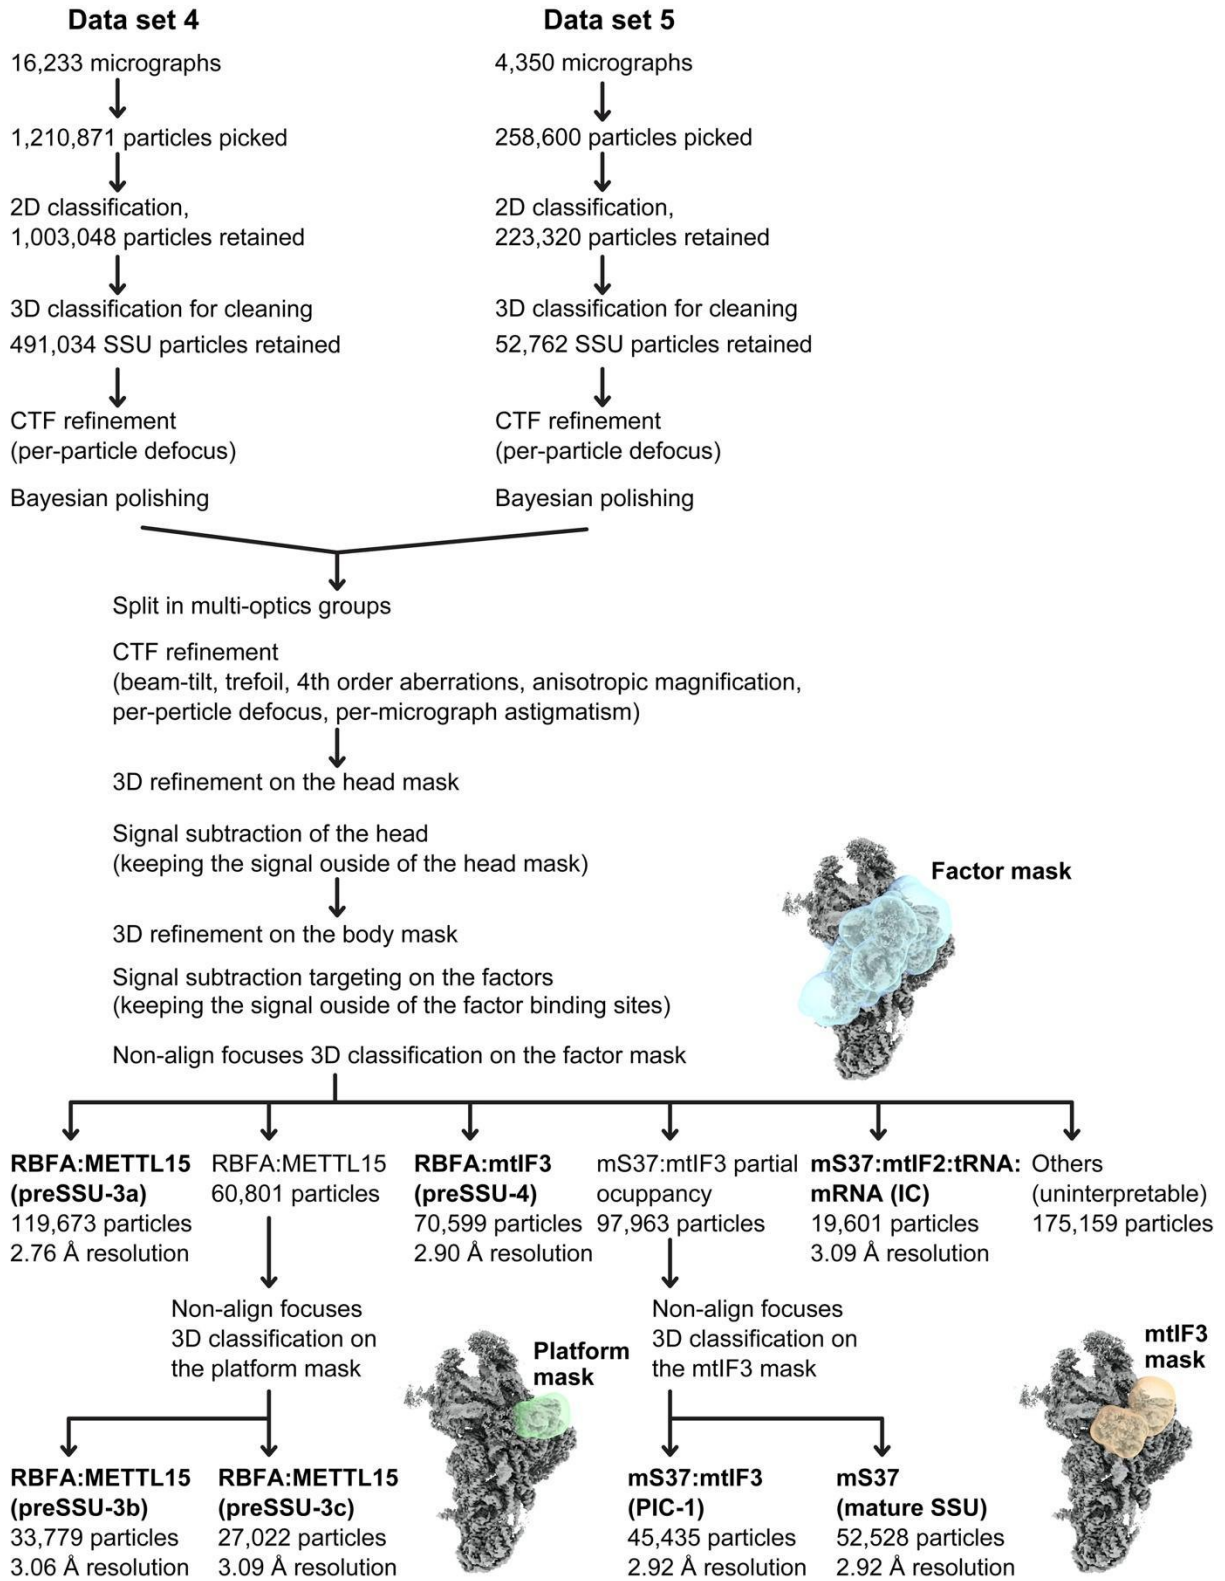

SI Figure 2. Cryo-EM processing overview for preSSU-3, preSSU-4, PIC-1, IC states.

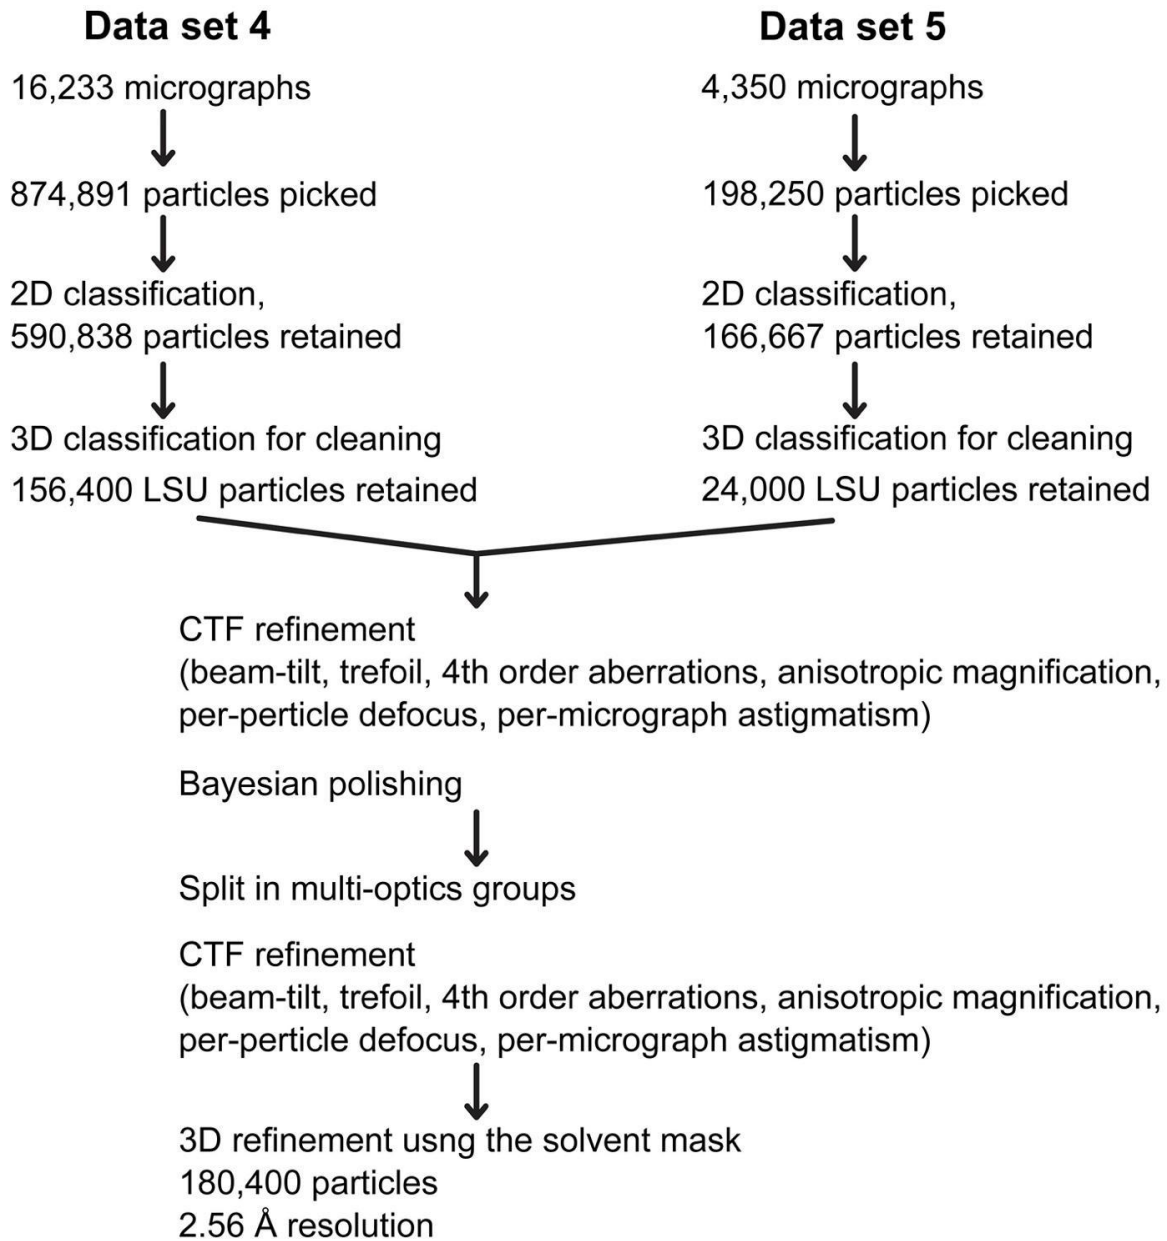

**SI Figure 3. Cryo-EM processing overview for LSU.**

Figure 3d. autoradiograph

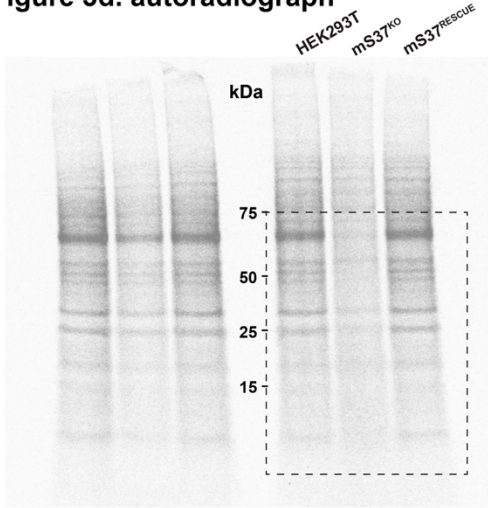

Figure 3d. loading control

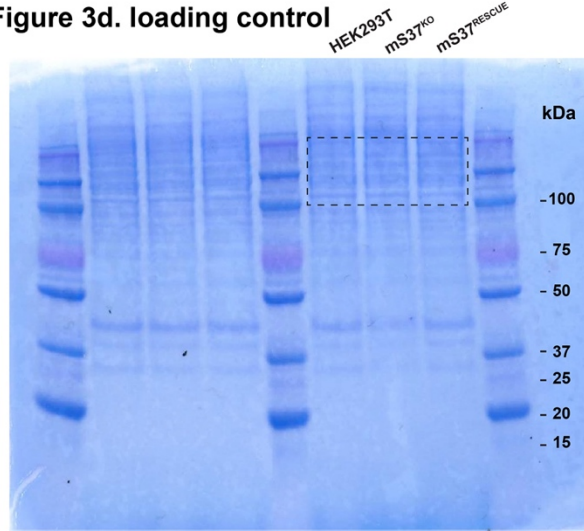

Figure 3e (A) and Extended Data Figure 11a (B)

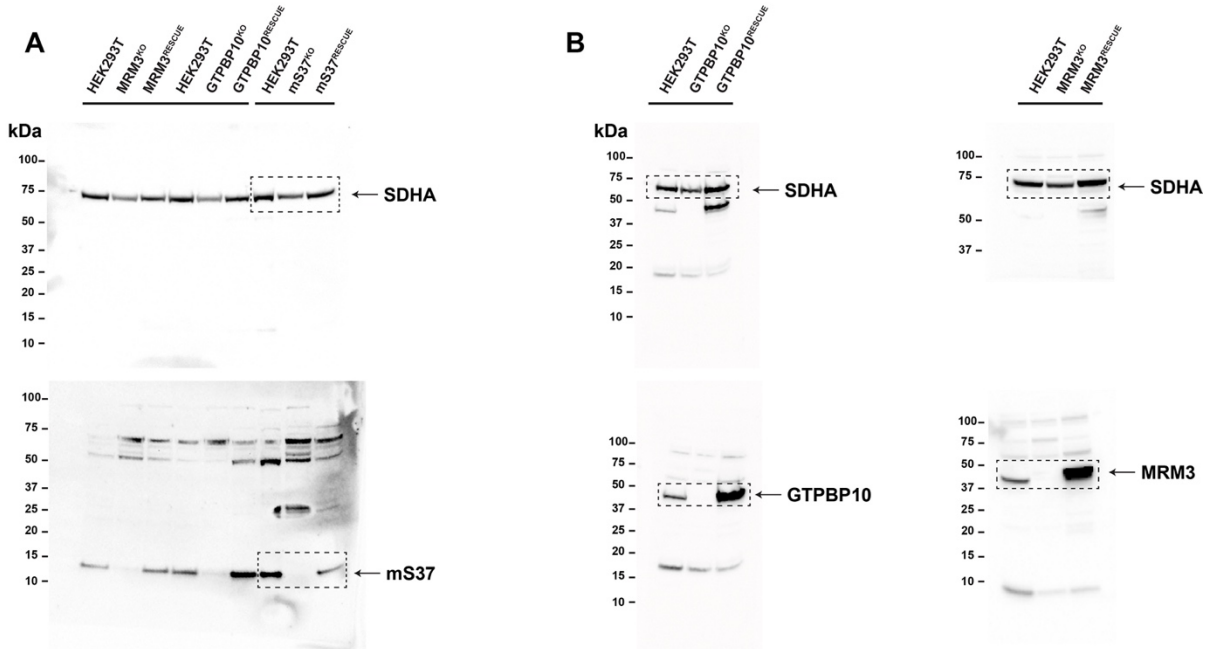





**Figure 3e. Sucrose gradient: HEK293T and mS37 KO**

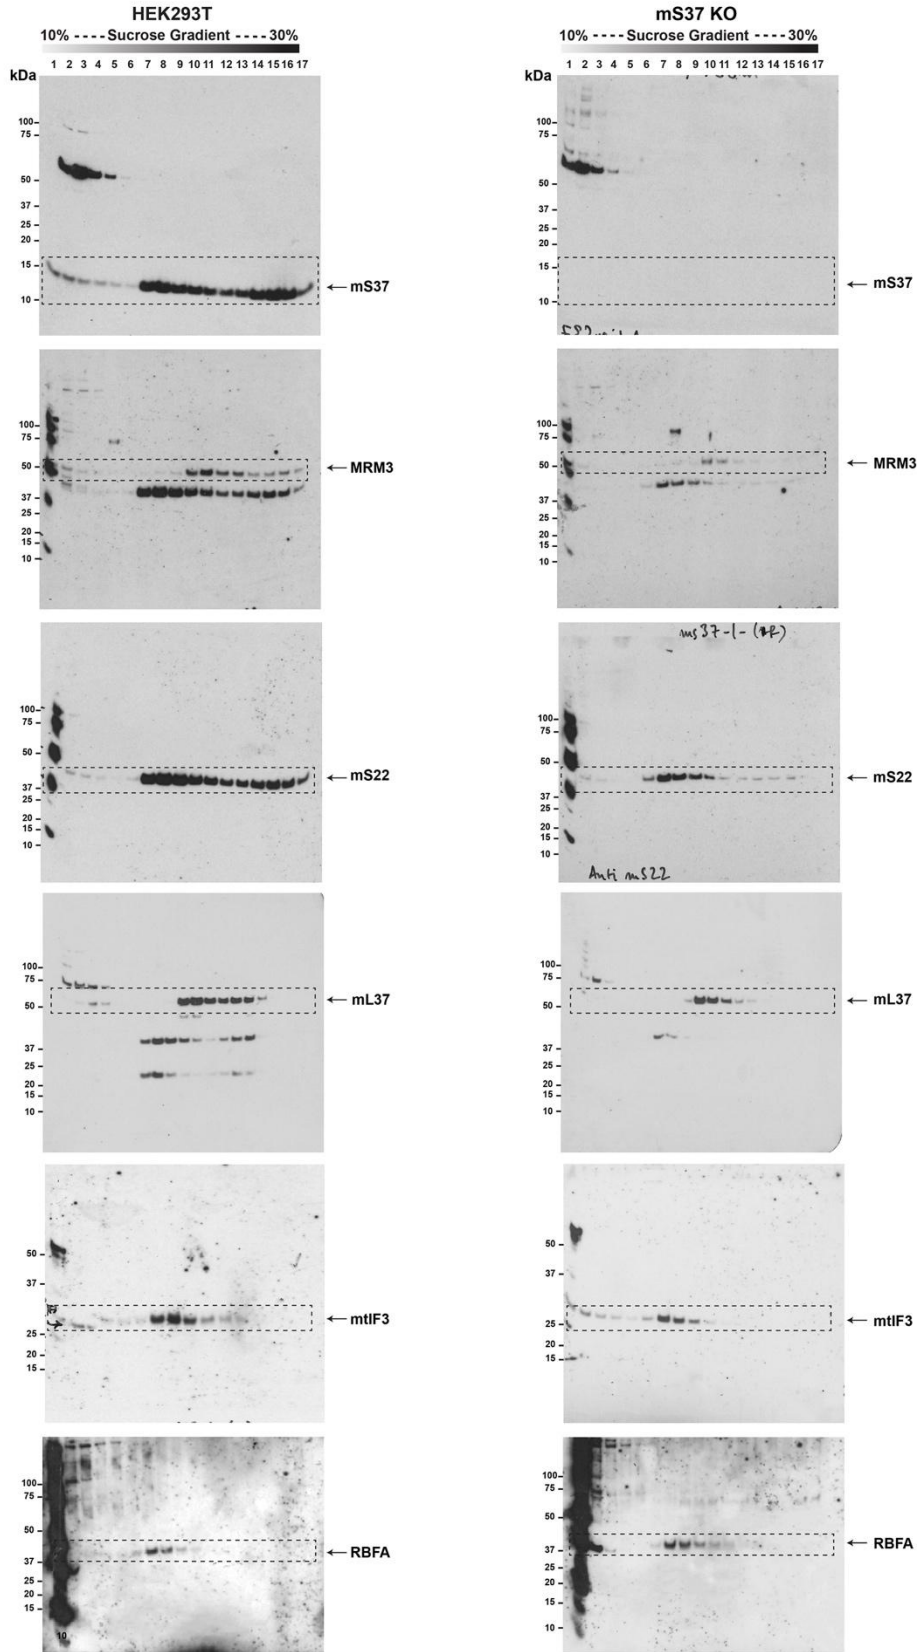

**SI Figure 5. Full-length sucrose gradients blots from figure 3b.**

Extended Data Fig. 10b. Autoradiograph

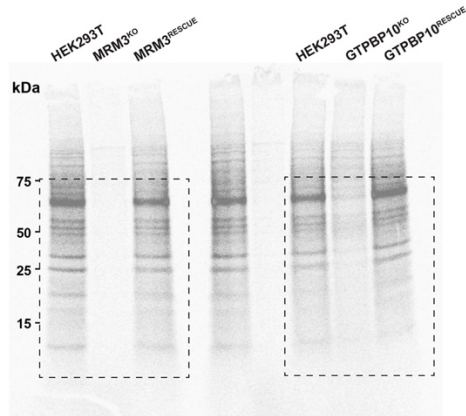

Extended Data Fig. 10b. Loading control

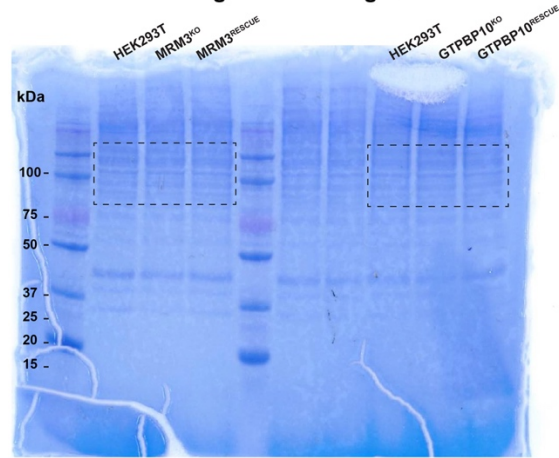

Extended Data Fig. 10c.

Sucrose gradient: HEK293T, MRM3 KO, GTPBP10 KO

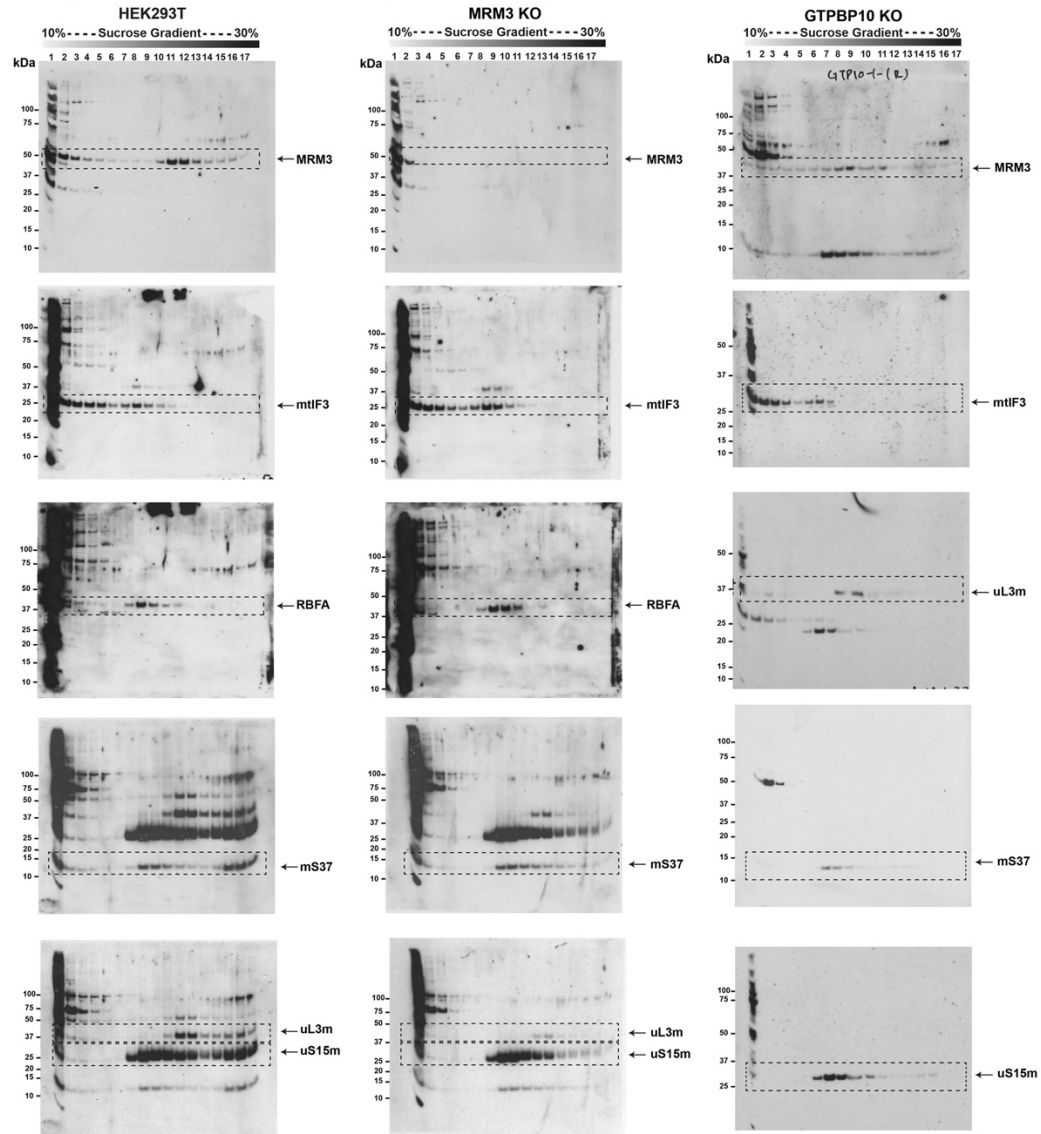

SI Figure 6. Full-length autoradiograph, loading control gel and sucrose gradient blots from Extended Data Fig. 10b,c.

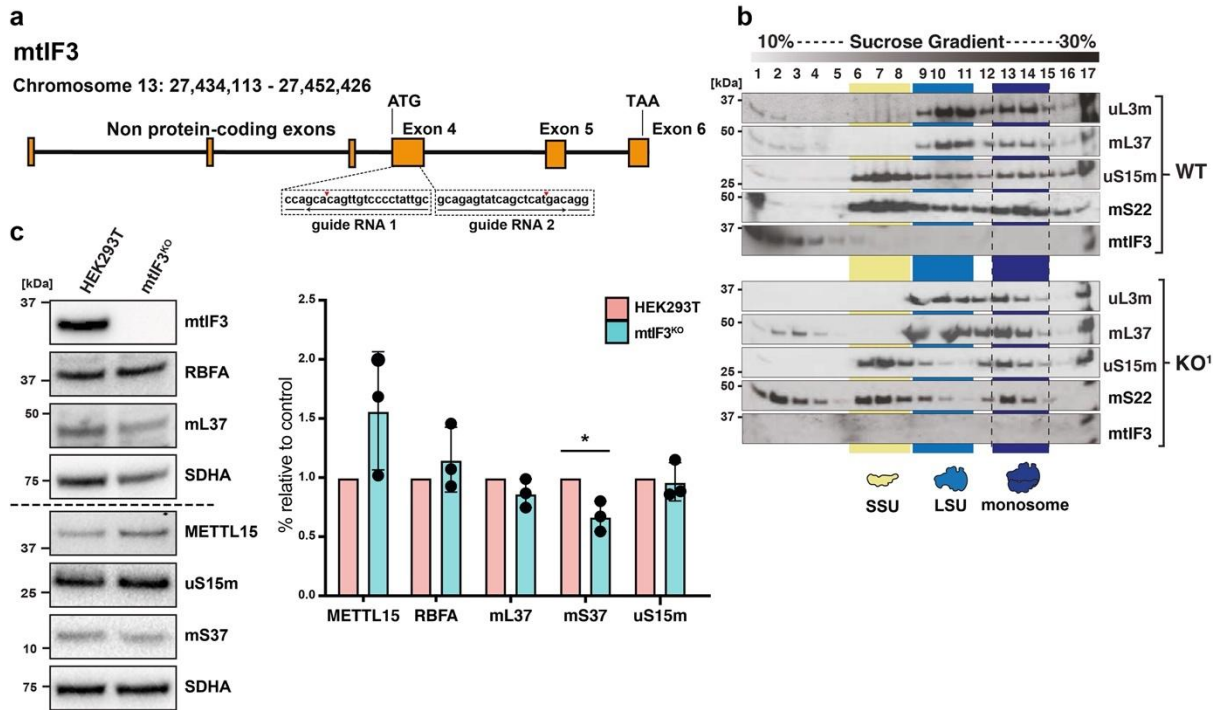

**SI Figure 7. Western blot and sucrose gradient: HEK293T and mtIF3 KO.**

**a**, A mtIF3 knockout cell line was generated. **b**, A monosome fraction is not majorly affected in mtIF3 knockout. **c**, A mild reduction of mS37 steady-state levels is consistent with the finding that mtIF3 binds before mS37. Steady-state levels of mitochondrial proteins and assembly factors in the WT HEK293 and mtIF3KO were analyzed by immunoblotting; SDHA was used as a loading control (left panel). Quantifications of the steady-state levels were performed from three biologically independent experiments (right panel). Data were expressed as mean  $\pm$  S.D; Student's two-tailed t-test was used (\* $p < 0.05$ ).

**SI Figure 7b. Sucrose gradient: HEK293T and mtIF3KO**

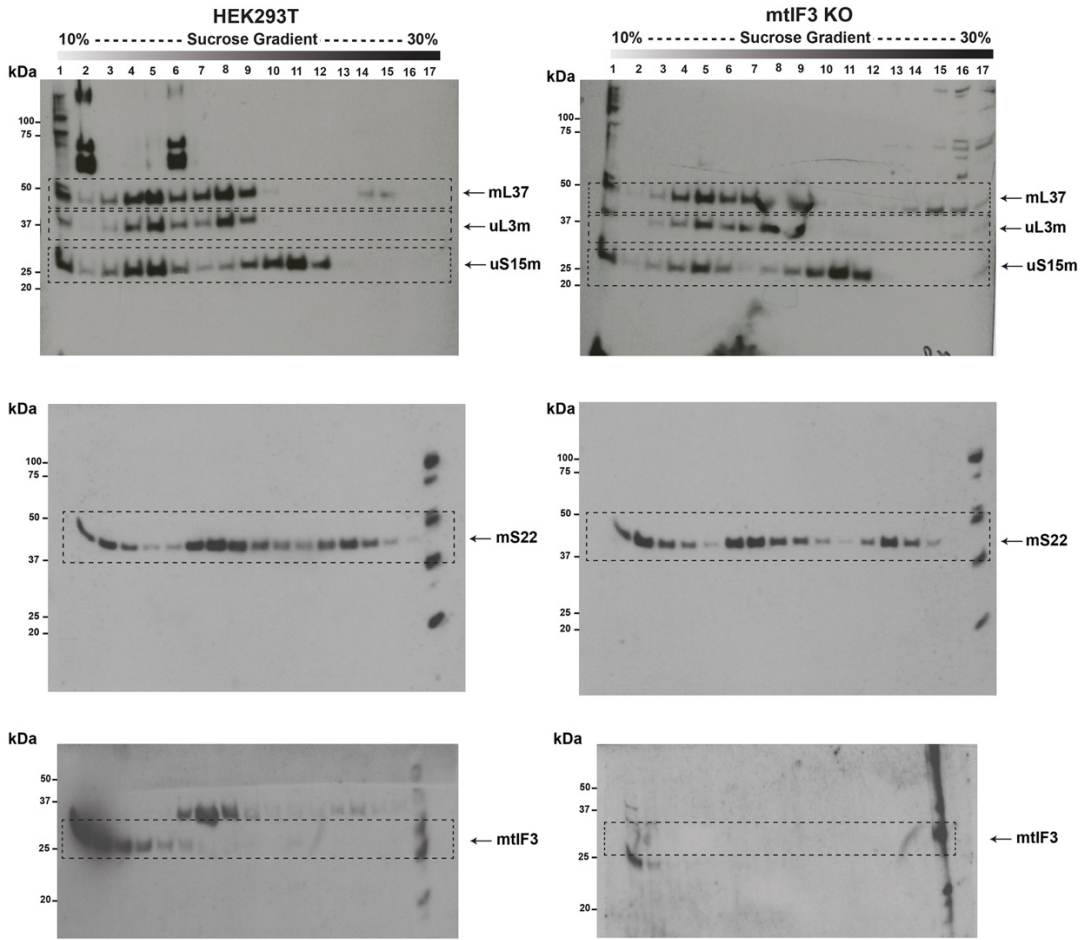

**SI Figure 7c. Western blots**

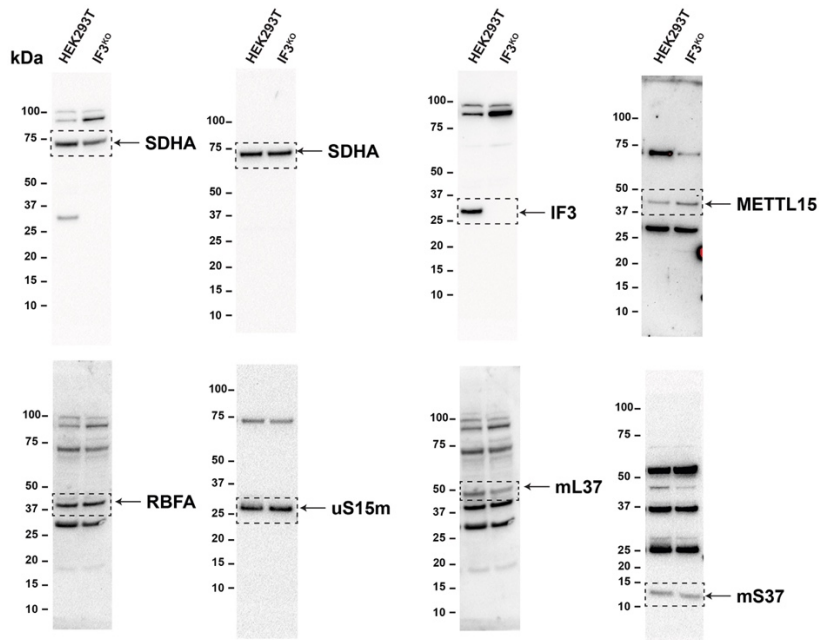

**SI Figure 8. Full-length western blot and sucrose gradient: HEK293T and mtIF3 KO, related to Supplementary Information Fig. 7.**

|                                                                                                                                  | preSSU-1<br>(PDB: 7PNT)<br>(EMD-13551)                                             | preSSU-2<br>(PDB: 7PNU)<br>(EMD-13552)                            | preSSU-3c<br>(PDB: 7PNV)<br>(EMD-13553)                                              | Mature SSU<br>(PDB: 7PNW)<br>(EMD-13554)          |
|----------------------------------------------------------------------------------------------------------------------------------|------------------------------------------------------------------------------------|-------------------------------------------------------------------|--------------------------------------------------------------------------------------|---------------------------------------------------|
| <b>Data collection and Processing</b>                                                                                            |                                                                                    |                                                                   |                                                                                      |                                                   |
| Microscope                                                                                                                       | Titan Krios                                                                        | Titan Krios                                                       | Titan Krios                                                                          | Titan Krios                                       |
| Voltage (kV)                                                                                                                     | 300                                                                                | 300                                                               | 300                                                                                  | 300                                               |
| Camera                                                                                                                           | K2 Summit                                                                          | K2 Summit                                                         | K2 Summit                                                                            | K2 Summit                                         |
| Magnification                                                                                                                    | 165,000                                                                            | 165,000                                                           | 165,000                                                                              | 165,000                                           |
| Pixel size at detector (Å/pixel)                                                                                                 | 0.83                                                                               | 0.83                                                              | 0.83                                                                                 | 0.83                                              |
| Total electron exposure (e <sup>-</sup> /Å <sup>2</sup> )                                                                        | 30–31                                                                              | 30–31                                                             | 30–31                                                                                | 30–31                                             |
| Exposure rate (e <sup>-</sup> /pixel/sec)                                                                                        | 5.0–5.3                                                                            | 5.0–5.3                                                           | 5.0–5.3                                                                              | 5.0–5.3                                           |
| Number of frames                                                                                                                 | 20                                                                                 | 20                                                                | 20                                                                                   | 20                                                |
| Defocus range (µm)                                                                                                               | –0.8 to –3.6                                                                       | –0.8 to –3.6                                                      | –0.8 to –3.6                                                                         | –0.8 to –3.6                                      |
| Energy filter slit width (V)                                                                                                     | 20                                                                                 | 20                                                                | 20                                                                                   | 20                                                |
| Micrographs collected (no.)                                                                                                      | 26,468                                                                             | 26,468                                                            | 26,468                                                                               | 26,468                                            |
| Final particles (no.)                                                                                                            | 52,361                                                                             | 64,431                                                            | 59,111                                                                               | 44,121                                            |
| Point group                                                                                                                      | C <sub>1</sub>                                                                     | C <sub>1</sub>                                                    | C <sub>1</sub>                                                                       | C <sub>1</sub>                                    |
| Resolution (global, Å) FSC 0.143 (masked)<br>(Overall/ shoulder/ platform/ back/ tail/<br>head-AP/ head-PE/ mS39/ factor)        | 3.19/ 2.93/ 3.06/ 2.93/ 2.93/<br>3.06/ 3.09/ 3.24/ 2.95<br>(RBFA)/<br>3.00 (TFB1M) | 3.06/ 2.86/ 2.93/ 2.87/ 2.89/<br>2.93/ 2.93/ 3.24/ 2.93<br>(RBFA) | 3.06/ 2.81/ 2.95/ 2.87/ 3.19/<br>2.91/ 2.93/ 2.89/ 2.89<br>(RBFA)/<br>2.91 (METTL15) | 3.09/ 2.83/ 2.93/ 2.91/ 2.95/<br>2.97/ 3.00/ 3.29 |
| Map-sharpening <i>B</i> factor (Å <sup>2</sup> ) (Overall/<br>shoulder/ platform/ back/ tail/ head-AP/<br>head-PE/ mS39/ factor) | –51/ –50/ –49/ –37/ –49/<br>–55/ –50/ –82/ –56 (RBFA)/<br>–58 (TFB1M)              | –54/ –45/ –50/ –48/ –47/<br>–48/ –48/ –71/ –56 (RBFA)             | –41/ –44/ –41/ –45/ –64/<br>–41/ –46/ –46/ –46 (RBFA)/<br>–55 (METTL15)              | –40/ –42/ –41/ –45/ –47/<br>–43/ –44/ –69         |
| <b>Model composition</b>                                                                                                         |                                                                                    |                                                                   |                                                                                      |                                                   |
| Atoms (non-hydrogen/ hydrogen)                                                                                                   | 68,913/ 59,549                                                                     | 67,976/ 57,668                                                    | 71,078/ 60,889                                                                       | 67,911/ 57,690                                    |
| Chains (RNA/ protein)                                                                                                            | 1/ 31                                                                              | 1/ 30                                                             | 1/ 31                                                                                | 1/ 30                                             |
| RNA residues (non-modified/ modified)                                                                                            | 909/ 0                                                                             | 941/ 0                                                            | 947/ 4                                                                               | 950/ 4                                            |
| Protein residues (non-modified/ modified)                                                                                        | 6,038/ 2                                                                           | 5,765/ 2                                                          | 6,143/ 2                                                                             | 5,744/ 3                                          |
| Metal ions (Mg <sup>2+</sup> / K <sup>+</sup> / Zn <sup>2+</sup> )                                                               | 34/ 7/ 1                                                                           | 42/ 7/ 1                                                          | 49/ 13/ 1                                                                            | 57/ 10/ 1                                         |
| Ligands (2Fe-2S /ATP/ SAH)                                                                                                       | 2/ 1/ 0                                                                            | 2/ 1/ 0                                                           | 2/ 1/ 1                                                                              | 2/ 1/ 0                                           |
| Waters                                                                                                                           | 470                                                                                | 1,017                                                             | 868                                                                                  | 783                                               |
| <b>Model Refinement</b>                                                                                                          |                                                                                    |                                                                   |                                                                                      |                                                   |
| Model-Map CC (CC <sub>mask</sub> / CC <sub>box</sub> / CC <sub>peaks</sub> /<br>CC <sub>volume</sub> )                           | 0.76/ 0.76/ 0.68/ 0.74                                                             | 0.79/ 0.77/ 0.71/ 0.77                                            | 0.79/ 0.78/ 0.71/ 0.77                                                               | 0.80/ 0.79/ 0.72/ 0.78                            |
| Resolution (Å) by model-to-map FSC,<br>threshold 0.50 (masked/ unmasked)                                                         | 2.99/ 3.00                                                                         | 2.87/ 2.87                                                        | 2.87/ 2.87                                                                           | 2.88/ 2.89                                        |
| Average <i>B</i> factor (Å <sup>2</sup> ) (RNA/ protein/ metal<br>ion and ligand/ water)                                         | 34/ 21/ 18/ 13                                                                     | 25/ 18/ 13/ 9.4                                                   | 16/ 15/ 8.3/ 5.7                                                                     | 23/ 18/ 17/ 12                                    |
| R.m.s. deviations, bond lengths (Å)/ bond<br>angles (°)                                                                          | 0.002/ 0.422                                                                       | 0.002/ 0.425                                                      | 0.002/ 0.433                                                                         | 0.002/ 0.422                                      |
| <b>Validation</b>                                                                                                                |                                                                                    |                                                                   |                                                                                      |                                                   |
| MolProbity score                                                                                                                 | 0.89                                                                               | 0.90                                                              | 0.86                                                                                 | 0.87                                              |
| CaBLAM outliers (%)                                                                                                              | 0.63                                                                               | 0.62                                                              | 0.67                                                                                 | 0.61                                              |
| Clash score                                                                                                                      | 1.49                                                                               | 1.54                                                              | 1.32                                                                                 | 1.37                                              |
| Rotamer outliers (%)                                                                                                             | 0.02                                                                               | 0.02                                                              | 0.02                                                                                 | 0.02                                              |
| C <sub>β</sub> deviations                                                                                                        | 0                                                                                  | 0                                                                 | 0                                                                                    | 0                                                 |
| EMRinger score                                                                                                                   | 3.80                                                                               | 4.11                                                              | 3.83                                                                                 | 3.89                                              |
| Ramachandran plot (%) (Favored/ allowed/<br>disallowed)                                                                          | 98.51/ 1.46/ 0.03                                                                  | 98.52/ 1.44/ 0.04                                                 | 98.45/ 1.53/ 0.02                                                                    | 98.54/ 1.45/ 0.02                                 |

### Supplementary Table 1. Cryo-EM statistics for preSSU-1 and preSSU-2.

Data collection, processing, model refinement and validation statistics for states preSSU-1 and preSSU-2 states.

|                                                                                                                            | preSSU-3a<br>(PDB: 7PNX)<br>(EMD-13555)                           | preSSU-3b<br>(PDB: 7PNY)<br>(EMD-13556)                           | preSSU-3c<br>(PDB: 7PNZ)<br>(EMD-13557)                           | preSSU-4<br>(PDB: 7PO0)<br>(EMD-13558)                        | PIC-1<br>(PDB: 7PO1)<br>(EMD-13559)               | IC<br>(PDB: 7PO2)<br>(EMD-13560)                  | Mature SSU<br>(PDB: 7PO3)<br>(EMD-13561) | preLSU<br>(PDB: 7PO4)<br>(EMD-13562)                          |
|----------------------------------------------------------------------------------------------------------------------------|-------------------------------------------------------------------|-------------------------------------------------------------------|-------------------------------------------------------------------|---------------------------------------------------------------|---------------------------------------------------|---------------------------------------------------|------------------------------------------|---------------------------------------------------------------|
| <b>Data collection and Processing</b>                                                                                      |                                                                   |                                                                   |                                                                   |                                                               |                                                   |                                                   |                                          |                                                               |
| Microscope                                                                                                                 | Titan Krios                                                       | Titan Krios                                                       | Titan Krios                                                       | Titan Krios                                                   | Titan Krios                                       | Titan Krios                                       | Titan Krios                              | Titan Krios                                                   |
| Voltage (kV)                                                                                                               | 300                                                               | 300                                                               | 300                                                               | 300                                                           | 300                                               | 300                                               | 300                                      | 300                                                           |
| Camera                                                                                                                     | K2 Summit                                                         | K2 Summit                                                         | K2 Summit                                                         | K2 Summit                                                     | K2 Summit                                         | K2 Summit                                         | K2 Summit                                | K2 Summit                                                     |
| Magnification                                                                                                              | 165,000                                                           | 165,000                                                           | 165,000                                                           | 165,000                                                       | 165,000                                           | 165,000                                           | 165,000                                  | 165,000                                                       |
| Pixel size at detector (Å/pixel)                                                                                           | 0.81                                                              | 0.81                                                              | 0.81                                                              | 0.81                                                          | 0.81                                              | 0.81                                              | 0.81                                     | 0.81                                                          |
| Total electron exposure (e <sup>-</sup> /Å <sup>2</sup> )                                                                  | 31–32                                                             | 31–32                                                             | 31–32                                                             | 31–32                                                         | 31–32                                             | 31–32                                             | 31–32                                    | 31–32                                                         |
| Exposure rate (e <sup>-</sup> /pixel/sec)                                                                                  | 4.1–5.9                                                           | 4.1–5.9                                                           | 4.1–5.9                                                           | 4.1–5.9                                                       | 4.1–5.9                                           | 4.1–5.9                                           | 4.1–5.9                                  | 4.1–5.9                                                       |
| Number of frames                                                                                                           | 20                                                                | 20                                                                | 20                                                                | 20                                                            | 20                                                | 20                                                | 20                                       | 20                                                            |
| Defocus range (µm)                                                                                                         | -1.0 to -3.8                                                      | -1.0 to -3.8                                                      | -1.0 to -3.8                                                      | -1.0 to -3.8                                                  | -1.0 to -3.8                                      | -1.0 to -3.8                                      | -1.0 to -3.8                             | -1.0 to -3.8                                                  |
| Energy filter slit width (V)                                                                                               | 20                                                                | 20                                                                | 20                                                                | 20                                                            | 20                                                | 20                                                | 20                                       | 20                                                            |
| Micrographs collected (no.)                                                                                                | 20,583                                                            | 20,583                                                            | 20,583                                                            | 20,583                                                        | 20,583                                            | 20,583                                            | 20,583                                   | 20,583                                                        |
| Final particles (no.)                                                                                                      | 119,673                                                           | 33,779                                                            | 27,022                                                            | 70,599                                                        | 45,435                                            | 19,601                                            | 52,528                                   | 180,400                                                       |
| Point group                                                                                                                | C <sub>1</sub>                                                    | C <sub>1</sub>                                                    | C <sub>1</sub>                                                    | C <sub>1</sub>                                                | C <sub>1</sub>                                    | C <sub>1</sub>                                    | C <sub>1</sub>                           | C <sub>1</sub>                                                |
| Resolution (global, Å)                                                                                                     | 2.76/ 2.49/                                                       | 3.06/ 2.78/                                                       | 3.09/ 2.86/                                                       | 2.90/ 2.63/ 2.72/                                             | 2.92/ 2.70/                                       | 3.09/ 2.90/                                       | 2.92/ 2.67/                              | 2.56/ 2.52                                                    |
| FSC 0.143 (masked)                                                                                                         | 2.59/ 2.56/                                                       | 2.92/ 2.90/                                                       | 2.95/ 2.92/                                                       | 2.74/ 2.86/ 2.72/                                             | 2.76/ 2.72/                                       | 2.92/ 2.92/                                       | 2.70/ 2.72/                              | (Body)/ 2.76                                                  |
| (Overall/ shoulder/ platform/ back/ tail/ head-AP/ head-PE/ mS39/ factor)                                                  | 2.74/ 2.57/ 2.74/ 2.86/ 2.59 (RBFA)/ 2.64 (METTL15)               | 3.09/ 2.90/ 2.99/ 3.27/ 2.92 (RBFA)/ 2.95 (METTL15)               | 3.11/ 2.95/ 3.04/ 3.29/ 2.97 (RBFA)/ 2.99 (METTL15)               | 2.86/ 3.11/ 2.67 (RBFA)/ 2.68 (IF3)                           | 2.92/ 2.82/ 2.97/ 3.11/ 2.70 (IF3)                | 3.19/ 2.92/ 3.06/ 3.32/ 2.97 (IF2)                | 2.86/ 2.76/ 2.90/ 3.19                   | (CP)/ 2.98 (L10-L7/L12)/ 2.60 (MALSU1-ACP)                    |
| Map-sharpening <i>B</i> factor (Å <sup>2</sup> ) (Overall/ shoulder/ platform/ back/ tail/ head-AP/ head-PE/ mS39/ factor) | -42/ -38/ -41/ -46/ -47/ -41/ -54/ -61/ -44 (RBFA)/ -53 (METTL15) | -46/ -39/ -42/ -39/ -49/ -43/ -45/ -73/ -51 (RBFA)/ -50 (METTL15) | -46/ -37/ -44/ -36/ -64/ -41/ -48/ -61/ -47 (RBFA)/ -40 (METTL15) | -42/ -40/ -42/ -47/ -51/ -40/ -44/ -67/ -47 (RBFA)/ -47 (IF3) | -44/ -35/ -37/ -42/ -49/ -44/ -52/ -57/ -40 (IF3) | -44/ -31/ -37/ -43/ -58/ -37/ -37/ -67/ -37 (IF2) | -40/ -34/ -38/ -38/ -51/ -42/ -58/ -69   | -40/ -38 (Body)/ -51 (CP)/ -59 (L10-L7/L12)/ -54 (MALSU1-ACP) |
| <b>Model composition</b>                                                                                                   |                                                                   |                                                                   |                                                                   |                                                               |                                                   |                                                   |                                          |                                                               |
| Atoms (non-hydrogen/ hydrogen)                                                                                             | 72,634/ 61,133                                                    | 71,215/ 60,982                                                    | 71,258/ 60,982                                                    | 70,406/ 59,872                                                | 69,876/ 59,325                                    | 75,175/ 63,995                                    | 68,637/ 57,624                           | 100,401/ 85,962                                               |
| Chains (RNA/ protein)                                                                                                      | 1/ 31                                                             | 1/ 31                                                             | 1/ 31                                                             | 1/ 31                                                         | 1/ 31                                             | 3/ 32                                             | 1/ 30                                    | 2/ 58                                                         |
| RNA residues (non-modified/ modified)                                                                                      | 946/ 5                                                            | 946/ 5                                                            | 946/ 5                                                            | 946/ 5                                                        | 950/ 5                                            | 1,051/ 6                                          | 950/ 5                                   | 1,214/ 3                                                      |
| Protein residues (non-modified/ modified)                                                                                  | 6,155/ 2                                                          | 6,137/ 2                                                          | 6,137/ 2                                                          | 5,994/ 2                                                      | 5,913/ 3                                          | 6,371/ 3                                          | 5,710/ 3                                 | 8,822/ 4                                                      |
| Metal ions (Mg <sup>2+</sup> / K <sup>+</sup> / Zn <sup>2+</sup> )                                                         | 64/ 16/ 1                                                         | 61/ 20/ 1                                                         | 61/ 17/ 1                                                         | 65/ 17/ 1                                                     | 71/ 20/ 1                                         | 72/ 20/ 1                                         | 64/ 21/ 1                                | 35/ 8/ 1                                                      |
| Ligands (2Fe-2S /ATP/ GDP/ NAD/ other)                                                                                     | 2/ 1/ 1/ 1/ 1 (SAH)                                               | 2/ 1/ 1/ 1/ 1 (SAH)                                               | 2/ 1/ 1/ 1/ 1 (SAH)                                               | 2/ 1/ 1/ 1/ 0                                                 | 2/ 1/ 1/ 0/ 0                                     | 2/ 1/ 1/ 0/ 0/ 1 (GTP)/ 1 (fMet)                  | 2/ 1/ 1/ 0/ 0                            | 1/ 0/ 0/ 0/ 1 (S-dodecanoyl-4'-PP)                            |
| Waters                                                                                                                     | 2,156                                                             | 882                                                               | 928                                                               | 1,166                                                         | 1,173                                             | 807                                               | 1,578                                    | 2,543                                                         |
| <b>Model Refinement</b>                                                                                                    |                                                                   |                                                                   |                                                                   |                                                               |                                                   |                                                   |                                          |                                                               |
| Model-Map CC (CC <sub>mask</sub> / CC <sub>box</sub> / CC <sub>peaks</sub> / CC <sub>volume</sub> )                        | 0.85/ 0.80/ 0.75/ 0.82                                            | 0.79/ 0.78/ 0.71/ 0.77                                            | 0.79/ 0.78/ 0.71/ 0.77                                            | 0.82/ 0.79/ 0.74/ 0.80                                        | 0.84/ 0.81/ 0.76/ 0.81                            | 0.79/ 0.78/ 0.71/ 0.77                            | 0.85/ 0.81/ 0.77/ 0.83                   | 0.83/ 0.77/ 0.72/ 0.80                                        |
| Resolution (Å) by model-to-map FSC, threshold 0.50 (masked/ unmasked)                                                      | 2.51/ 2.52                                                        | 2.90/ 2.90                                                        | 2.90/ 2.91                                                        | 2.70/ 2.75                                                    | 2.73/ 2.74                                        | 2.93/ 2.94                                        | 2.69/ 2.69                               | 2.40/ 2.40                                                    |
| Average <i>B</i> factor (Å <sup>2</sup> ) (RNA/ protein/ metal ion and ligand/ water)                                      | 30/ 28/ 19/ 20                                                    | 22/ 20/ 14/ 13                                                    | 23/ 22/ 16/ 13                                                    | 19/ 19/ 13/ 13                                                | 26/ 22/ 15/ 12                                    | 26/ 23/ 23/ 17                                    | 26/ 23/ 15/ 11                           | 43/ 28/ 33/ 14                                                |
| R.m.s. deviations, bond lengths (Å)/ bond angles (°)                                                                       | 0.002/ 0.416                                                      | 0.002/ 0.407                                                      | 0.002/ 0.408                                                      | 0.002/ 0.408                                                  | 0.002/ 0.402                                      | 0.002/ 0.406                                      | 0.002/ 0.406                             | 0.002/ 0.465                                                  |
| <b>Validation</b>                                                                                                          |                                                                   |                                                                   |                                                                   |                                                               |                                                   |                                                   |                                          |                                                               |
| MolProbity score                                                                                                           | 0.96                                                              | 1.00                                                              | 0.99                                                              | 0.94                                                          | 0.94                                              | 0.94                                              | 0.96                                     | 1.00                                                          |
| CaBLAM outliers (%)                                                                                                        | 0.67                                                              | 0.74                                                              | 0.72                                                              | 0.70                                                          | 0.67                                              | 0.64                                              | 0.68                                     | 0.67                                                          |
| Clash score                                                                                                                | 1.97                                                              | 2.24                                                              | 2.19                                                              | 1.81                                                          | 1.79                                              | 1.81                                              | 1.91                                     | 2.20                                                          |
| Rotamer outliers (%)                                                                                                       | 0.04                                                              | 0.06                                                              | 0.06                                                              | 0.02                                                          | 0.06                                              | 0.05                                              | 0.04                                     | 0.03                                                          |
| C <sub>β</sub> deviations                                                                                                  | 0                                                                 | 0                                                                 | 0                                                                 | 0                                                             | 0                                                 | 0                                                 | 0                                        | 0                                                             |
| Ramachandran plot (%) (Favored/ allowed/ disallowed)                                                                       | 98.74/ 1.24/ 0.02                                                 | 98.72/ 1.26/ 0.02                                                 | 98.77/ 1.19/ 0.03                                                 | 98.81/ 1.17/ 0.02                                             | 98.92/ 1.06/ 0.02                                 | 98.81/ 1.17/ 0.02                                 | 98.97/ 1.01/ 0.02                        | 98.40/ 1.60/ 0.00                                             |
| EMRinger score                                                                                                             | 5.10                                                              | 4.47                                                              | 4.20                                                              | 4.89                                                          | 4.84                                              | 4.44                                              | 5.07                                     | 5.09                                                          |

**Supplementary Table 2. Cryo-EM statistics for preSSU-3, preSSU-4, PIC-1, IC, LSU.**  
Data collection, processing, model refinement and validation statistics for states preSSU-3, preSSU-4, PIC-1, IC, and LSU.

|                                          | <i>H. sapiens</i>      | <i>M. musculus</i> |
|------------------------------------------|------------------------|--------------------|
| 5'-end                                   | 648                    | 1                  |
| h23                                      | 974-1014               | 321-363            |
| h24                                      | 1057-1098              | 406-447            |
| h27                                      | 1138-1165              | 488-515            |
| h28                                      | 1174-1192<br>1462-1480 | 524-541<br>816-834 |
| h28-h44 linker                           | 1481-1487              | 835-841            |
| h44                                      | 1488-1562              | 842-916            |
| h44-h45 linker                           | 1563-1571              | 917-925            |
| h45                                      | 1572-1593              | 926-947            |
| 3'-end                                   | 1594-1602              | 948-956            |
| m <sup>5</sup> U (by TRMT2B)             | 1076                   | 425                |
| m <sup>4</sup> C (by METTL15)            | 1486                   | 840                |
| m <sup>5</sup> C (by NSUN4)              | 1488                   | 842                |
| m <sup>6</sup> <sub>2</sub> A (by TFB1M) | 1583                   | 937                |
| m <sup>6</sup> <sub>2</sub> A (by TFB1M) | 1584                   | 938                |

**Supplementary Table 3. The positions/numbering of mouse 12S rRNA corresponding to that of human 12S rRNA.**

| <b>Antibody</b>           | <b>Company</b>          | <b>Catalog no.</b> | <b>Dilutions</b> |
|---------------------------|-------------------------|--------------------|------------------|
| SDHA                      | Abcam                   | ab14715            | 1:2000           |
| C18orf22/RBFA             | Abcam                   | ab224741           | 1:1000           |
| METTL15                   | Merck                   | HPA039885          | 1:1000           |
| CHCHD1/mS37               | ThermoFisher Scientific | <b>PA5-58635</b>   | <b>1:500</b>     |
| mtIF3                     | Proteintech Group       | 14219-1-AP         | 1:1000           |
| GTPBP10                   | Merck                   | HPA021076          | 1:500            |
| RNMTL1/MRM3               | Merck                   | HPA023292          | 1:1000           |
| uS15m                     | Proteintech Group       | 17006-1-AP         | 1:2000           |
| mS22                      | Proteintech Group       | 10984-1-AP         | 1:2000           |
| mS35                      | Proteintech Group       | 16457-1-AP         | 1:2000           |
| uL3m                      | Merck                   | HPA043665          | 1:1000           |
| uL12m                     | Merck                   | HPA022853          | 1:2000           |
| mL37                      | Merck                   | HPA025826          | 1:2000           |
| HRP secondary anti-rabbit | GE Healthcare           | NA9340V            | 1:2000           |
| HRP secondary anti-mouse  | GE Healthcare           | NA9310V            | 1:2000           |

| <b>gRNA for mS37 exon 1</b>    | <b>Sequence 5' to 3'</b>   |
|--------------------------------|----------------------------|
| gRNA 1 top                     | CACCGGGTTTATTGGGCTTCAGCAC  |
| gRNA 1 bottom                  | AAACGTGCTGAAGCCCAATAAACCC  |
| gRNA 2 top                     | CACCGCCGCGTCGGGGAGCGGCGCC  |
| gRNA 2 bottom                  | AAACGGCGCCGCTCCCCGACGCGGC  |
| <b>gRNA for MRM3 exon 1</b>    |                            |
| gRNA 1 top                     | CACCGCTACGATAAAGCTTATCCCG  |
| gRNA 1 bottom                  | AAACCGGGATAAGCTTTATCGTAGC  |
| gRNA 2 top                     | CACCGTGTTCACCACCTCTCCGGA   |
| gRNA 2 bottom                  | AAACTCCGGAGAGGTGGTGGAAACAC |
| <b>gRNA for GTPBP10 exon 1</b> |                            |
| gRNA 1 top                     | CACCGCCAGCCACAAACCGTTTCCG  |
| gRNA 1 bottom                  | AAACCGGAAACGGTTTGTGGCTGGC  |
| gRNA 2 top                     | CACCGACGAGGATAACCCATTCCAC  |
| gRNA 2 bottom                  | AAACGTGGAATGGGTTATCCTCGTC  |

**Supplementary Table 4. List of guide RNAs and antibodies.**
